# Supplementary material for: Restoring striatal WAVE-1 improves maze exploration performance of GluN1 knockdown mice
Source: PLoS One. 2018 Oct 23;13(10):e0199341. doi: 10.1371/journal.pone.0199341 (PMC6198945; doi:10.1371/journal.pone.0199341)
Supplement: S1 Table — (XLSX) [file pone.0199341.s001.xlsx]

## Sheet: Sheet1
Figure	Experiment	Preliminary statistics test including sex as an independent variable	Genotype effect		Sex-genotype interaction effect		Sex effect
			Test statistic	p value	Test statistic	p value	Test statistic	p value
6	Striatal WAVE-1 Western Blot	Scheirer-Ray-Hare Test	H = 27.52	< 0.001	H = 0.927	0.818939	H = 0.083	0.77283
7b	Y-Maze	2-way ANOVA	F(3,84) = 5.357	0.002	F(3,84) = 0.347	0.792	F(1,84) = 5.778	0.018					only male NR1 vs NR1TG has a p = 0.004	only NR1Tg MvF (F is less) = 0.041
7c	8-Arm Radial Maze (WME)	3-way repeated measures ANOVA	F(3,36) = 50.816	< 0.001	F(3,36) = 1.037	0.388	F(1,36) = 0.006	0.939				interact		sex
7c	8-Arm Radial Maze (ETR)	3-way repeated measures ANOVA	F(3,36) = 69.512	< 0.001	F(3,36) = 2.063	0.122	F(1,36) = 0.947	0.337				SS	MS	SS	MS
8a	Puzzle Box Performance - Trial 1	Scheirer-Ray-Hare Test	H = 25.277	< 0.001	H = 1.431	0.698366	H = 0.181	0.670573				1101.3	367.1	139.28	139.28		3
8a	Puzzle Box Performance - Trial 2	Scheirer-Ray-Hare Test	H = 46.093	< 0.001	H = 1.739	0.62826	H = 0.474	0.491089				1247.03	415.677	339.97	339.97		3
8a	Puzzle Box Performance - Trial 3	Scheirer-Ray-Hare Test	H = 24.486	< 0.001	H = 1.231	0.74553	H = 0.18	0.671374				782.673	260.891	114.425	114.425		3
8a	Puzzle Box Performance - Trial 4	Scheirer-Ray-Hare Test	H = 45.114	< 0.001	H = 1.013	0.798046	H = 0.002	0.96135				654.702	218.234	1.517	1.517		3
8a	Puzzle Box Performance - Trial 5	Scheirer-Ray-Hare Test	H = 56.539	< 0.001	H = 1.362	0.714472	H = 2.652	0.103441		burrowing, nest making behaviour?
8a	Puzzle Box Performance - Trial 6	Scheirer-Ray-Hare Test	H = 57.620	< 0.001	H = 1.539	0.673209	H = 1.977	0.159725		memory formation, females solved it first, etc. ?
8a	Puzzle Box Performance - Trial 7	Scheirer-Ray-Hare Test	H = 54.359	< 0.001	H = 0.03	0.998634	H = 0.147	0.701288
8a	Puzzle Box Performance - Trial 8	Scheirer-Ray-Hare Test	H = 38.754	< 0.001	H = 1.084	0.78088	H = 1.999	0.157413
8a	Puzzle Box Performance - Trial 9	Scheirer-Ray-Hare Test	H = 38.602	< 0.001	H = 0.746	0.862266	H = 0.825	0.363641
8b	Open Field Locomotion	3-way repeated measures ANOVA	F(3,79) = 55.289	< 0.001	F(3,79) = 2.378	0.076	F(1,79) = 3.648	0.06
8c	Social Approach Test (Social Zone Time)	2-way ANOVA	F(3,88) = 6.634	< 0.001	F(3,88) = 2.318	0.081	F(1,88) = 0.168	0.683
8c	Social Approach Test (Nonsocial Zone Time)	2-way ANOVA	F(3,88) = 14.167	< 0.001	F(3,88) = 0.408	0.747	F(1,88) = 0.119	0.731
9a	Hippocampal WAVE-1 Western Blot	2-way ANOVA	F(3,40) = 2.558	0.069	F(3,40) = 0.846	0.477	F(1,40) = 0.46	0.502
